# Supplementary material for: Replication-first reciprocal genome editing resolves ANKRD1 as a convergent regulatory target at the 17q21.31 locus
Source: Research Square preprint supplement (doi:10.21203/rs.3.rs-8728680/v1), 2026-02-13
Supplement: Supplementary file 1 [file eeeac21dda626701a8b9d137.docx]

**Supplementary figures for Replication-first reciprocal genome editing resolves ANKRD1 as a convergent regulatory target at the 17q21.31 locus**

Oyedele J. Olaoye1,2, Sophie L. Farrow1,2,3 ⱡ, Antony A. Cooper4,5, Denis M. Nyaga1, Justin M. O’Sullivan1,5,6,7*

1. Liggins Institute, The University of Auckland, Auckland 1023, New Zealand.
2. Maurice Wilkins Centre for Molecular Biodiscovery, Auckland 1010, New Zealand.
3. Oxford Parkinson’s Disease Centre, Kavli Institute for Nanoscience discovery, Dorothy Crowfoot Hodgkin Building, University of Oxford, Oxford, OX1 3QU, United Kingdom
4. St Vincent’s Clinical School, UNSW Sydney, Sydney, NSW, Australia.
5. Australian Parkinson’s Mission, Garvan Institute of Medical Research, Sydney, New South Wales, Australia.
6. MRC Lifecourse Epidemiology Unit, University of Southampton, United Kingdom.
7. Singapore Institute for Clinical Sciences, Agency for Science, Technology and Research (A*STAR), Singapore, Singapore.

ⱡ Current address.

*Corresponding author: [justin.osullivan@auckland.ac.nz](mailto:justin.osullivan@auckland.ac.nz)


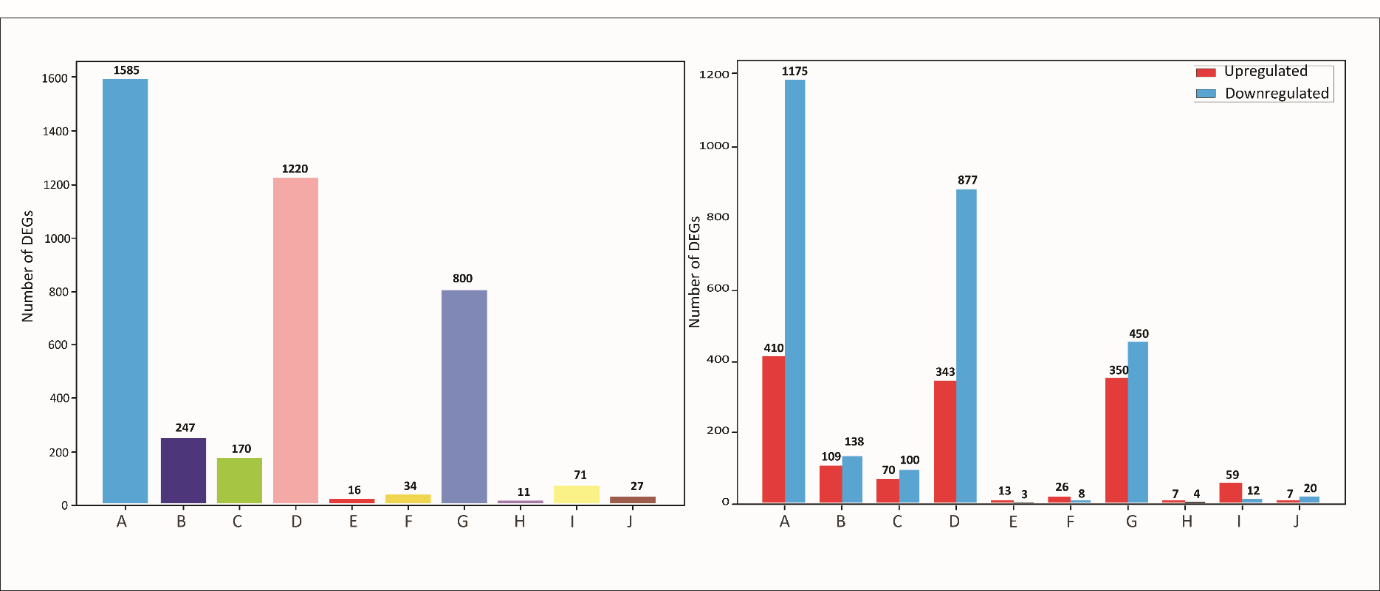


**Figure S1: Global burden and directionality of differentially expressed genes (DEGs) across all pairwise contrasts (FDR-adjusted p ≤ 0.05 and |log₂FC| ≥ 1)**

Left panel (total DEGs per contrast). Bars show the number of significant DEGs for each comparison (exact counts are printed above the bars). From left to right:

(A) rs77692262 G|G vs rs77692262 A|A on a rs79724577 A|A background (i.e., edited at rs77692262 only versus wild type): 1,585 DEGs.

(B) rs79724577 C|C vs rs79724577 A|A on a rs77692262 A|A background (edited at rs79724577): 247 DEGs.

(C) rs79724577 C|C (new clones) vs rs79724577 A|A on a rs77692262 A|A background (edited at rs79724577): 170 DEGs.

(D) rs77692262 G|G; rs79724577 A|A vs rs77692262 G|G; rs79724577 C|C: 1,220 DEGs.

(E) rs79724577 C|C; rs77692262 A|A (rs77692262 reference) vs rs77692262 G|G; rs79724577 C|C: 16 DEGs.

(F) rs79724577 C|C (new clones); rs77692262 A|A (rs77692262 reference) vs rs77692262 G|G; rs79724577 C|C: 34 DEGs.

(G) rs77692262 G|G; rs79724577 A|A vs rs79724577 C|C; rs77692262 G|G: 800 DEGs.

(H) rs79724577 C|C; rs77692262 A|A vs rs79724577 C|C; rs77692262 G|G: 11 DEGs.

(I) rs79724577 C|C (new clones); rs77692262 A|A vs rs79724577 C|C; rs77692262 G|G: 71 DEGs.

(J) rs77692262 G|G; rs79724577 C|C vs rs79724577 C|C; rs77692262 G|G -reciprocal double-edited clone-control: 27 DEGs.

Right panel (directionality). Each bar is split into upregulated (red) and downregulated (blue) counts for the same contrasts. Highlights: the rs77692262 G|G vs A|A comparison shows the largest burden (1,585 DEGs; 410 up / 1,175 down), whereas rs79724577 edits on a wild-type rs77692262 background are smaller but show a dosage trend (C|C vs A|A: 247 DEGs; 109 up / 138 down; C|C (new clones) vs A|A: 170 DEGs; 70 up / 100 down). Background-swap contrasts (e.g., rs77692262 G|G vs rs77692262 G|G; rs79724577 C|C, rs77692262 G|G vs rs79724577 C|C; rs77692262 G|G) can display large totals (e.g., 1,220 and 800 DEGs), yet - as shown by the three-way Venn analyses-only a small subset replicates across reciprocal backgrounds, reflecting context specificity of many signals.


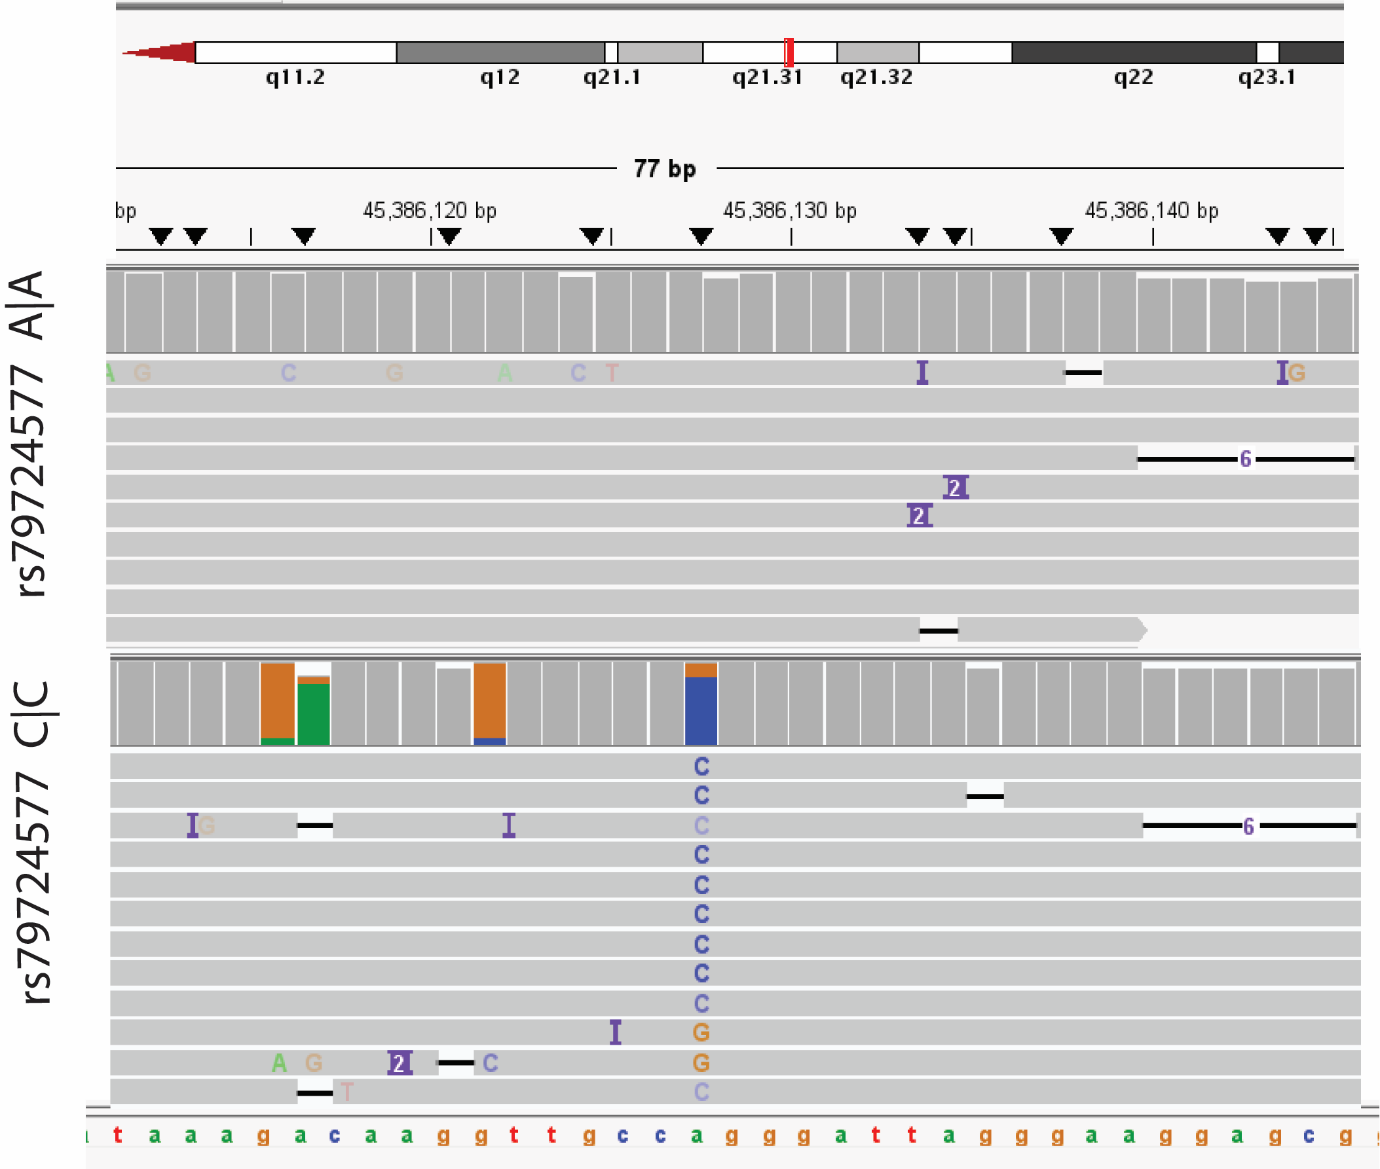


**Figure S2: Validation of precise single-nucleotide edits at rs79724577 in new clone.**

Long-read validation of rs79724577 (hg38 chr17: 45,386,127). Read pileups across a 77-bp window confirm the A allele in the parental clone and homozygous C in the edited clone.


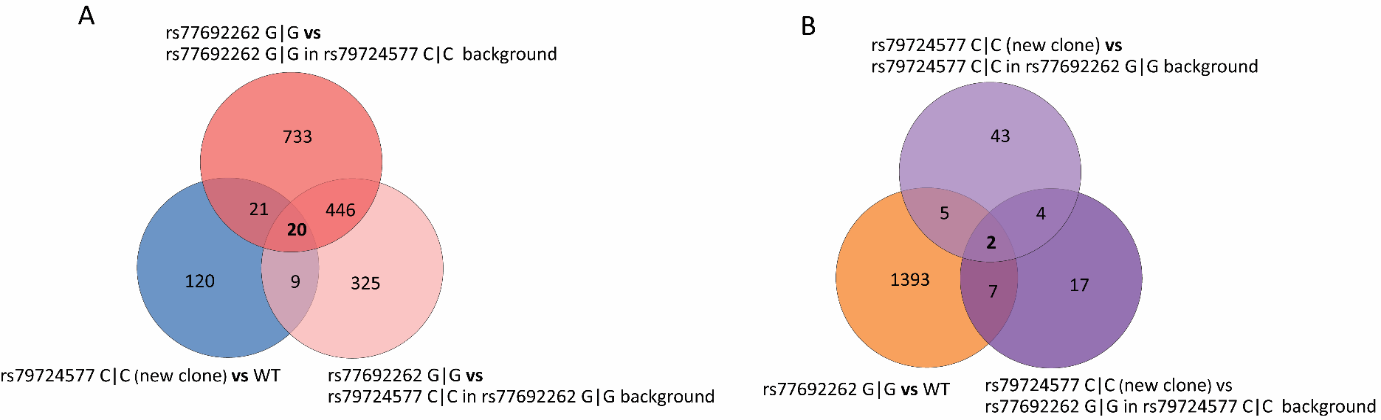


**Figure S3: Three-way intersection analysis confirms similar genes in rs79724577 (A>C) new clone cohort.**

(A) rs79724577 attribution. Venn diagram of DEGs derived from cross-background validation for rs79724577 (A>C): rs79724577 C|C; rs77692262 A|A (new clone) vs wild type (WT-anchored), rs77692262 G|G; rs79724577 A|A vs rs77692262 G|G in the rs79724577 C|C background, and rs77692262 G|G; rs79724577 A|A vs rs79724577 C|C in the rs77692262 G|G background (reciprocal double edit). The stringent three-way overlap identifies a core set of 20 DEGs, representing the most reproducible, variant-attributable transcriptional changes. Peripheral sectors correspond to background- or context-dependent DEGs (e.g., 733, 446). Numbers denote gene counts per region; areas are illustrative. DEGs were defined at adjusted p-value (FDR) ≤ 0.05 and |log₂FC| ≥ 1.

(B) rs77692262 attribution. Venn diagram showing overlap of differentially expressed genes (DEGs) from three pairwise contrasts: rs77692262 G|G; rs79724577 A|A vs wild type (WT-anchored), rs79724577 C|C; rs77692262 A|A (new clone) vs rs77692262 G|G in the rs79724577 C|C background, and rs79724577 C|C; rs77692262 A|A (new clone) vs rs79724577 C|C in the rs77692262 G|G background (reciprocal orientation). The three-way intersection yields two shared DEGs, while the majority of genes (e.g., 1,393) are unique to individual comparisons, highlighting the strong influence of genetic background on transcriptional output.
